# Supplementary material for: Factors Associated With Laser Trabeculoplasty Response Duration: Analysis of a Large Clinical Database (IRIS Registry)
Source: PubMed Central journal article supplement — J Glaucoma. 2021 Aug 9;30(10):902–10. doi: 10.1097/IJG.0000000000001918 (PMC8483774; doi:10.1097/ijg.0000000000001918), 2021-08-09
Supplement: ijg-30-902-s001.pdf [file ijg-30-902-s001.pdf]

Supplemental Table 1: Diagnosis codes included in the IRIS Registry Laser Trabeculoplasty Study

| code   | ICD9 | description                                                                      |
|--------|------|----------------------------------------------------------------------------------|
| 365    | ICD9 | Glaucoma                                                                         |
| 365.0  | ICD9 | Borderline glaucoma (glaucoma suspect)                                           |
| 365.00 | ICD9 | Preglaucoma, unspecified                                                         |
| 365.01 | ICD9 | Open angle with borderline findings, low risk                                    |
| 365.02 | ICD9 | Anatomical narrow angle borderline glaucoma                                      |
| 365.03 | ICD9 | Steroid responders borderline glaucoma                                           |
| 365.04 | ICD9 | Ocular hypertension                                                              |
| 365.05 | ICD9 | Open angle with borderline findings, high risk                                   |
| 365.06 | ICD9 | Primary angle closure without glaucoma damage                                    |
| 365.1  | ICD9 | Open-angle glaucoma                                                              |
| 365.10 | ICD9 | Open-angle glaucoma, unspecified                                                 |
| 365.11 | ICD9 | Primary open angle glaucoma                                                      |
| 365.12 | ICD9 | Low tension open-angle glaucoma                                                  |
| 365.13 | ICD9 | Pigmentary open-angle glaucoma                                                   |
| 365.14 | ICD9 | Glaucoma of childhood                                                            |
| 365.15 | ICD9 | Residual stage of open angle glaucoma                                            |
| 365.3  | ICD9 | Corticosteroid-induced glaucoma                                                  |
| 365.31 | ICD9 | Corticosteroid-induced glaucoma, glaucomatous stage                              |
| 365.32 | ICD9 | Corticosteroid-induced glaucoma, residual stage                                  |
| 365.4  | ICD9 | Glaucoma associated with congenital anomalies dystrophies and systemic syndromes |
| 365.41 | ICD9 | Glaucoma associated with chamber angle anomalies                                 |
| 365.42 | ICD9 | Glaucoma associated with anomalies of iris                                       |
| 365.43 | ICD9 | Glaucoma associated with other anterior segment anomalies                        |
| 365.44 | ICD9 | Glaucoma associated with systemic syndromes                                      |
| 365.5  | ICD9 | Glaucoma associated with disorders of the lens                                   |
| 365.51 | ICD9 | Phacolytic glaucoma                                                              |
| 365.52 | ICD9 | Pseudoexfoliation glaucoma                                                       |
| 365.59 | ICD9 | Glaucoma associated with other lens disorders                                    |
| 365.6  | ICD9 | Glaucoma associated with other ocular disorders                                  |
| 365.60 | ICD9 | Glaucoma associated with unspecified ocular disorder                             |
| 365.61 | ICD9 | Glaucoma associated with pupillary block                                         |
| 365.62 | ICD9 | Glaucoma associated with ocular inflammations                                    |
| 365.63 | ICD9 | Glaucoma associated with vascular disorders                                      |
| 365.64 | ICD9 | Glaucoma associated with tumors or cysts                                         |
| 365.65 | ICD9 | Glaucoma associated with ocular trauma                                           |
| 365.7  | ICD9 | Glaucoma stage                                                                   |
| 365.70 | ICD9 | Glaucoma stage, unspecified                                                      |
| 365.71 | ICD9 | Mild stage glaucoma                                                              |
| 365.72 | ICD9 | Moderate stage glaucoma                                                          |
| 365.73 | ICD9 | Severe stage glaucoma                                                            |
| 365.74 | ICD9 | Indeterminate stage glaucoma                                                     |
| 365.8  | ICD9 | Other specified forms of glaucoma                                                |
| 365.81 | ICD9 | Hypersecretion glaucoma                                                          |
| 365.82 | ICD9 | Glaucoma with increased episcleral venous pressure                               |
| 365.83 | ICD9 | Aqueous misdirection                                                             |

|         |      |                                                                |
|---------|------|----------------------------------------------------------------|
| 365.89  | ICD9 | Other specified glaucoma                                       |
| 365.9   | ICD9 | Nonspecified glaucoma                                          |
|         | ICD1 |                                                                |
| H40     | 0    | Glaucoma                                                       |
|         | ICD1 |                                                                |
| H40.0   | 0    | Glaucoma suspect                                               |
|         | ICD1 |                                                                |
| H40.00  | 0    | Preglaucoma, unspecified                                       |
|         | ICD1 |                                                                |
| H40.001 | 0    | Preglaucoma, unspecified right eye                             |
|         | ICD1 |                                                                |
| H40.002 | 0    | Preglaucoma, unspecified left eye                              |
|         | ICD1 |                                                                |
| H40.003 | 0    | Preglaucoma, unspecified bilateral                             |
|         | ICD1 |                                                                |
| H40.009 | 0    | Preglaucoma, unspecified eye                                   |
|         | ICD1 |                                                                |
| H40.01  | 0    | Open angle with borderline findings, low risk                  |
|         | ICD1 |                                                                |
| H40.011 | 0    | Open angle with borderline findings, low risk right eye        |
|         | ICD1 |                                                                |
| H40.012 | 0    | Open angle with borderline findings, low risk left eye         |
|         | ICD1 |                                                                |
| H40.013 | 0    | Open angle with borderline findings, low risk bilateral        |
|         | ICD1 |                                                                |
| H40.019 | 0    | Open angle with borderline findings, low risk unspecified eye  |
|         | ICD1 |                                                                |
| H40.02  | 0    | Open angle with borderline findings, high risk                 |
|         | ICD1 |                                                                |
| H40.021 | 0    | Open angle with borderline findings, high risk right eye       |
|         | ICD1 |                                                                |
| H40.022 | 0    | Open angle with borderline findings, high risk left eye        |
|         | ICD1 |                                                                |
| H40.023 | 0    | Open angle with borderline findings, high risk bilateral       |
|         | ICD1 |                                                                |
| H40.029 | 0    | Open angle with borderline findings, high risk unspecified eye |
|         | ICD1 |                                                                |
| H40.03  | 0    | Anatomical narrow angle                                        |
|         | ICD1 |                                                                |
| H40.031 | 0    | Anatomical narrow angle right eye                              |
|         | ICD1 |                                                                |
| H40.032 | 0    | Anatomical narrow angle left eye                               |
|         | ICD1 |                                                                |
| H40.033 | 0    | Anatomical narrow angle bilateral                              |
|         | ICD1 |                                                                |
| H40.039 | 0    | Anatomical narrow angle unspecified eye                        |
|         | ICD1 |                                                                |
| H40.04  | 0    | Steroid responder                                              |
|         | ICD1 |                                                                |
| H40.041 | 0    | Steroid responder right eye                                    |
|         | ICD1 |                                                                |
| H40.042 | 0    | Steroid responder left eye                                     |
|         | ICD1 |                                                                |
| H40.043 | 0    | Steroid responder bilateral                                    |

|          |           |                                                               |
|----------|-----------|---------------------------------------------------------------|
| H40.049  | ICD1<br>0 | Steroid responder unspecified eye                             |
| H40.05   | ICD1<br>0 | Ocular hypertension                                           |
| H40.051  | ICD1<br>0 | Ocular hypertension right eye                                 |
| H40.052  | ICD1<br>0 | Ocular hypertension left eye                                  |
| H40.053  | ICD1<br>0 | Ocular hypertension bilateral                                 |
| H40.059  | ICD1<br>0 | Ocular hypertension unspecified eye                           |
| H40.06   | ICD1<br>0 | Primary angle closure without glaucoma damage                 |
| H40.061  | ICD1<br>0 | Primary angle closure without glaucoma damage right eye       |
| H40.062  | ICD1<br>0 | Primary angle closure without glaucoma damage left eye        |
| H40.063  | ICD1<br>0 | Primary angle closure without glaucoma damage bilateral       |
| H40.069  | ICD1<br>0 | Primary angle closure without glaucoma damage unspecified eye |
| H40.1    | ICD1<br>0 | Open-angle glaucoma                                           |
| H40.10   | ICD1<br>0 | Unspecified open-angle glaucoma                               |
| H40.10X  | ICD1<br>0 | Unspecified open-angle glaucoma stage unspecified             |
| H40.10X  | ICD1<br>1 | Unspecified open-angle glaucoma mild stage                    |
| H40.10X  | ICD1<br>2 | Unspecified open-angle glaucoma moderate stage                |
| H40.10X  | ICD1<br>3 | Unspecified open-angle glaucoma severe stage                  |
| H40.10X  | ICD1<br>4 | Unspecified open-angle glaucoma indeterminate stage           |
| H40.11   | ICD1<br>0 | Primary open-angle glaucoma                                   |
| H40.111  | ICD1<br>0 | Primary open-angle glaucoma, right eye                        |
| H40.1110 | ICD1<br>0 | Primary open-angle glaucoma, right eye stage unspecified      |
| H40.1111 | ICD1<br>0 | Primary open-angle glaucoma, right eye mild stage             |
| H40.1112 | ICD1<br>0 | Primary open-angle glaucoma, right eye moderate stage         |
| H40.1113 | ICD1<br>0 | Primary open-angle glaucoma, right eye severe stage           |
| H40.1114 | ICD1<br>0 | Primary open-angle glaucoma, right eye indeterminate stage    |
| H40.112  | ICD1<br>0 | Primary open-angle glaucoma, left eye                         |
| H40.1120 | ICD1<br>0 | Primary open-angle glaucoma, left eye stage unspecified       |
| H40.1121 | ICD1<br>0 | Primary open-angle glaucoma, left eye mild stage              |

|          |           |                                                                  |
|----------|-----------|------------------------------------------------------------------|
| H40.1122 | ICD1<br>0 | Primary open-angle glaucoma, left eye moderate stage             |
| H40.1123 | ICD1<br>0 | Primary open-angle glaucoma, left eye severe stage               |
| H40.1124 | ICD1<br>0 | Primary open-angle glaucoma, left eye indeterminate stage        |
| H40.113  | ICD1<br>0 | Primary open-angle glaucoma, bilateral                           |
| H40.1130 | ICD1<br>0 | Primary open-angle glaucoma, bilateral stage unspecified         |
| H40.1131 | ICD1<br>0 | Primary open-angle glaucoma, bilateral mild stage                |
| H40.1132 | ICD1<br>0 | Primary open-angle glaucoma, bilateral moderate stage            |
| H40.1133 | ICD1<br>0 | Primary open-angle glaucoma, bilateral severe stage              |
| H40.1134 | ICD1<br>0 | Primary open-angle glaucoma, bilateral indeterminate stage       |
| H40.119  | ICD1<br>0 | Primary open-angle glaucoma, unspecified eye                     |
| H40.1190 | ICD1<br>0 | Primary open-angle glaucoma, unspecified eye stage unspecified   |
| H40.1191 | ICD1<br>0 | Primary open-angle glaucoma, unspecified eye mild stage          |
| H40.1192 | ICD1<br>0 | Primary open-angle glaucoma, unspecified eye moderate stage      |
| H40.1193 | ICD1<br>0 | Primary open-angle glaucoma, unspecified eye severe stage        |
| H40.1194 | ICD1<br>0 | Primary open-angle glaucoma, unspecified eye indeterminate stage |
| H40.12   | ICD1<br>0 | Low-tension glaucoma                                             |
| H40.121  | ICD1<br>0 | Low-tension glaucoma, right eye                                  |
| H40.1210 | ICD1<br>0 | Low-tension glaucoma, right eye stage unspecified                |
| H40.1211 | ICD1<br>0 | Low-tension glaucoma, right eye mild stage                       |
| H40.1212 | ICD1<br>0 | Low-tension glaucoma, right eye moderate stage                   |
| H40.1213 | ICD1<br>0 | Low-tension glaucoma, right eye severe stage                     |
| H40.1214 | ICD1<br>0 | Low-tension glaucoma, right eye indeterminate stage              |
| H40.122  | ICD1<br>0 | Low-tension glaucoma, left eye                                   |
| H40.1220 | ICD1<br>0 | Low-tension glaucoma, left eye stage unspecified                 |
| H40.1221 | ICD1<br>0 | Low-tension glaucoma, left eye mild stage                        |
| H40.1222 | ICD1<br>0 | Low-tension glaucoma, left eye moderate stage                    |
| H40.1223 | ICD1<br>0 | Low-tension glaucoma, left eye severe stage                      |
| H40.1224 | ICD1<br>0 | Low-tension glaucoma, left eye indeterminate stage               |

|          |           |                                                           |
|----------|-----------|-----------------------------------------------------------|
| H40.123  | ICD1<br>0 | Low-tension glaucoma, bilateral                           |
| H40.1230 | ICD1<br>0 | Low-tension glaucoma, bilateral stage unspecified         |
| H40.1231 | ICD1<br>0 | Low-tension glaucoma, bilateral mild stage                |
| H40.1232 | ICD1<br>0 | Low-tension glaucoma, bilateral moderate stage            |
| H40.1233 | ICD1<br>0 | Low-tension glaucoma, bilateral severe stage              |
| H40.1234 | ICD1<br>0 | Low-tension glaucoma, bilateral indeterminate stage       |
| H40.129  | ICD1<br>0 | Low-tension glaucoma, unspecified eye                     |
| H40.1290 | ICD1<br>0 | Low-tension glaucoma, unspecified eye stage unspecified   |
| H40.1291 | ICD1<br>0 | Low-tension glaucoma, unspecified eye mild stage          |
| H40.1292 | ICD1<br>0 | Low-tension glaucoma, unspecified eye moderate stage      |
| H40.1293 | ICD1<br>0 | Low-tension glaucoma, unspecified eye severe stage        |
| H40.1294 | ICD1<br>0 | Low-tension glaucoma, unspecified eye indeterminate stage |
| H40.13   | ICD1<br>0 | Pigmentary glaucoma                                       |
| H40.131  | ICD1<br>0 | Pigmentary glaucoma, right eye                            |
| H40.1310 | ICD1<br>0 | Pigmentary glaucoma, right eye stage unspecified          |
| H40.1311 | ICD1<br>0 | Pigmentary glaucoma, right eye mild stage                 |
| H40.1312 | ICD1<br>0 | Pigmentary glaucoma, right eye moderate stage             |
| H40.1313 | ICD1<br>0 | Pigmentary glaucoma, right eye severe stage               |
| H40.1314 | ICD1<br>0 | Pigmentary glaucoma, right eye indeterminate stage        |
| H40.132  | ICD1<br>0 | Pigmentary glaucoma, left eye                             |
| H40.1320 | ICD1<br>0 | Pigmentary glaucoma, left eye stage unspecified           |
| H40.1321 | ICD1<br>0 | Pigmentary glaucoma, left eye mild stage                  |
| H40.1322 | ICD1<br>0 | Pigmentary glaucoma, left eye moderate stage              |
| H40.1323 | ICD1<br>0 | Pigmentary glaucoma, left eye severe stage                |
| H40.1324 | ICD1<br>0 | Pigmentary glaucoma, left eye indeterminate stage         |
| H40.133  | ICD1<br>0 | Pigmentary glaucoma, bilateral                            |
| H40.1330 | ICD1<br>0 | Pigmentary glaucoma, bilateral stage unspecified          |
| H40.1331 | ICD1<br>0 | Pigmentary glaucoma, bilateral mild stage                 |

|          |           |                                                                                 |
|----------|-----------|---------------------------------------------------------------------------------|
| H40.1332 | ICD1<br>0 | Pigmentary glaucoma, bilateral moderate stage                                   |
| H40.1333 | ICD1<br>0 | Pigmentary glaucoma, bilateral severe stage                                     |
| H40.1334 | ICD1<br>0 | Pigmentary glaucoma, bilateral indeterminate stage                              |
| H40.139  | ICD1<br>0 | Pigmentary glaucoma, unspecified eye                                            |
| H40.1390 | ICD1<br>0 | Pigmentary glaucoma, unspecified eye stage unspecified                          |
| H40.1391 | ICD1<br>0 | Pigmentary glaucoma, unspecified eye mild stage                                 |
| H40.1392 | ICD1<br>0 | Pigmentary glaucoma, unspecified eye moderate stage                             |
| H40.1393 | ICD1<br>0 | Pigmentary glaucoma, unspecified eye severe stage                               |
| H40.1394 | ICD1<br>0 | Pigmentary glaucoma, unspecified eye indeterminate stage                        |
| H40.14   | ICD1<br>0 | Capsular glaucoma with pseudoexfoliation of lens                                |
| H40.141  | ICD1<br>0 | Capsular glaucoma with pseudoexfoliation of lens, right eye                     |
| H40.1410 | ICD1<br>0 | Capsular glaucoma with pseudoexfoliation of lens, right eye stage unspecified   |
| H40.1411 | ICD1<br>0 | Capsular glaucoma with pseudoexfoliation of lens, right eye mild stage          |
| H40.1412 | ICD1<br>0 | Capsular glaucoma with pseudoexfoliation of lens, right eye moderate stage      |
| H40.1413 | ICD1<br>0 | Capsular glaucoma with pseudoexfoliation of lens, right eye severe stage        |
| H40.1414 | ICD1<br>0 | Capsular glaucoma with pseudoexfoliation of lens, right eye indeterminate stage |
| H40.142  | ICD1<br>0 | Capsular glaucoma with pseudoexfoliation of lens, left eye                      |
| H40.1420 | ICD1<br>0 | Capsular glaucoma with pseudoexfoliation of lens, left eye stage unspecified    |
| H40.1421 | ICD1<br>0 | Capsular glaucoma with pseudoexfoliation of lens, left eye mild stage           |
| H40.1422 | ICD1<br>0 | Capsular glaucoma with pseudoexfoliation of lens, left eye moderate stage       |
| H40.1423 | ICD1<br>0 | Capsular glaucoma with pseudoexfoliation of lens, left eye severe stage         |
| H40.1424 | ICD1<br>0 | Capsular glaucoma with pseudoexfoliation of lens, left eye indeterminate stage  |
| H40.143  | ICD1<br>0 | Capsular glaucoma with pseudoexfoliation of lens, bilateral                     |
| H40.1430 | ICD1<br>0 | Capsular glaucoma with pseudoexfoliation of lens, bilateral stage unspecified   |
| H40.1431 | ICD1<br>0 | Capsular glaucoma with pseudoexfoliation of lens, bilateral mild stage          |
| H40.1432 | ICD1<br>0 | Capsular glaucoma with pseudoexfoliation of lens, bilateral moderate stage      |
| H40.1433 | ICD1<br>0 | Capsular glaucoma with pseudoexfoliation of lens, bilateral severe stage        |
| H40.1434 | ICD1<br>0 | Capsular glaucoma with pseudoexfoliation of lens, bilateral indeterminate stage |

|          |      |                                                                                       |
|----------|------|---------------------------------------------------------------------------------------|
|          | ICD1 |                                                                                       |
| H40.149  | 0    | Capsular glaucoma with pseudoexfoliation of lens, unspecified eye                     |
|          | ICD1 |                                                                                       |
| H40.1490 | 0    | Capsular glaucoma with pseudoexfoliation of lens, unspecified eye stage unspecified   |
|          | ICD1 |                                                                                       |
| H40.1491 | 0    | Capsular glaucoma with pseudoexfoliation of lens, unspecified eye mild stage          |
|          | ICD1 |                                                                                       |
| H40.1492 | 0    | Capsular glaucoma with pseudoexfoliation of lens, unspecified eye moderate stage      |
|          | ICD1 |                                                                                       |
| H40.1493 | 0    | Capsular glaucoma with pseudoexfoliation of lens, unspecified eye severe stage        |
|          | ICD1 |                                                                                       |
| H40.1494 | 0    | Capsular glaucoma with pseudoexfoliation of lens, unspecified eye indeterminate stage |
|          | ICD1 |                                                                                       |
| H40.15   | 0    | Residual stage of open-angle glaucoma                                                 |
|          | ICD1 |                                                                                       |
| H40.151  | 0    | Residual stage of open-angle glaucoma right eye                                       |
|          | ICD1 |                                                                                       |
| H40.152  | 0    | Residual stage of open-angle glaucoma left eye                                        |
|          | ICD1 |                                                                                       |
| H40.153  | 0    | Residual stage of open-angle glaucoma bilateral                                       |
|          | ICD1 |                                                                                       |
| H40.159  | 0    | Residual stage of open-angle glaucoma unspecified eye                                 |
|          | ICD1 |                                                                                       |
| H40.3    | 0    | Glaucoma secondary to eye trauma                                                      |
|          | ICD1 |                                                                                       |
| H40.30   | 0    | Glaucoma secondary to eye trauma, unspecified eye                                     |
| H40.30X  | ICD1 |                                                                                       |
| 0        | 0    | Glaucoma secondary to eye trauma, unspecified eye stage unspecified                   |
| H40.30X  | ICD1 |                                                                                       |
| 1        | 0    | Glaucoma secondary to eye trauma, unspecified eye mild stage                          |
| H40.30X  | ICD1 |                                                                                       |
| 2        | 0    | Glaucoma secondary to eye trauma, unspecified eye moderate stage                      |
| H40.30X  | ICD1 |                                                                                       |
| 3        | 0    | Glaucoma secondary to eye trauma, unspecified eye severe stage                        |
| H40.30X  | ICD1 |                                                                                       |
| 4        | 0    | Glaucoma secondary to eye trauma, unspecified eye indeterminate stage                 |
|          | ICD1 |                                                                                       |
| H40.31   | 0    | Glaucoma secondary to eye trauma, right eye                                           |
| H40.31X  | ICD1 |                                                                                       |
| 0        | 0    | Glaucoma secondary to eye trauma, right eye stage unspecified                         |
| H40.31X  | ICD1 |                                                                                       |
| 1        | 0    | Glaucoma secondary to eye trauma, right eye mild stage                                |
| H40.31X  | ICD1 |                                                                                       |
| 2        | 0    | Glaucoma secondary to eye trauma, right eye moderate stage                            |
| H40.31X  | ICD1 |                                                                                       |
| 3        | 0    | Glaucoma secondary to eye trauma, right eye severe stage                              |
| H40.31X  | ICD1 |                                                                                       |
| 4        | 0    | Glaucoma secondary to eye trauma, right eye indeterminate stage                       |
|          | ICD1 |                                                                                       |
| H40.32   | 0    | Glaucoma secondary to eye trauma, left eye                                            |
| H40.32X  | ICD1 |                                                                                       |
| 0        | 0    | Glaucoma secondary to eye trauma, left eye stage unspecified                          |
| H40.32X  | ICD1 |                                                                                       |
| 1        | 0    | Glaucoma secondary to eye trauma, left eye mild stage                                 |
| H40.32X  | ICD1 |                                                                                       |
| 2        | 0    | Glaucoma secondary to eye trauma, left eye moderate stage                             |

|         |      |                                                                             |
|---------|------|-----------------------------------------------------------------------------|
| H40.32X | ICD1 |                                                                             |
| 3       | 0    | Glaucoma secondary to eye trauma, left eye severe stage                     |
| H40.32X | ICD1 |                                                                             |
| 4       | 0    | Glaucoma secondary to eye trauma, left eye indeterminate stage              |
|         | ICD1 |                                                                             |
| H40.33  | 0    | Glaucoma secondary to eye trauma, bilateral                                 |
| H40.33X | ICD1 |                                                                             |
| 0       | 0    | Glaucoma secondary to eye trauma, bilateral stage unspecified               |
| H40.33X | ICD1 |                                                                             |
| 1       | 0    | Glaucoma secondary to eye trauma, bilateral mild stage                      |
| H40.33X | ICD1 |                                                                             |
| 2       | 0    | Glaucoma secondary to eye trauma, bilateral moderate stage                  |
| H40.33X | ICD1 |                                                                             |
| 3       | 0    | Glaucoma secondary to eye trauma, bilateral severe stage                    |
| H40.33X | ICD1 |                                                                             |
| 4       | 0    | Glaucoma secondary to eye trauma, bilateral indeterminate stage             |
|         | ICD1 |                                                                             |
| H40.4   | 0    | Glaucoma secondary to eye inflammation                                      |
|         | ICD1 |                                                                             |
| H40.40  | 0    | Glaucoma secondary to eye inflammation, unspecified eye                     |
| H40.40X | ICD1 |                                                                             |
| 0       | 0    | Glaucoma secondary to eye inflammation, unspecified eye stage unspecified   |
| H40.40X | ICD1 |                                                                             |
| 1       | 0    | Glaucoma secondary to eye inflammation, unspecified eye mild stage          |
| H40.40X | ICD1 |                                                                             |
| 2       | 0    | Glaucoma secondary to eye inflammation, unspecified eye moderate stage      |
| H40.40X | ICD1 |                                                                             |
| 3       | 0    | Glaucoma secondary to eye inflammation, unspecified eye severe stage        |
| H40.40X | ICD1 |                                                                             |
| 4       | 0    | Glaucoma secondary to eye inflammation, unspecified eye indeterminate stage |
|         | ICD1 |                                                                             |
| H40.41  | 0    | Glaucoma secondary to eye inflammation, right eye                           |
| H40.41X | ICD1 |                                                                             |
| 0       | 0    | Glaucoma secondary to eye inflammation, right eye stage unspecified         |
| H40.41X | ICD1 |                                                                             |
| 1       | 0    | Glaucoma secondary to eye inflammation, right eye mild stage                |
| H40.41X | ICD1 |                                                                             |
| 2       | 0    | Glaucoma secondary to eye inflammation, right eye moderate stage            |
| H40.41X | ICD1 |                                                                             |
| 3       | 0    | Glaucoma secondary to eye inflammation, right eye severe stage              |
| H40.41X | ICD1 |                                                                             |
| 4       | 0    | Glaucoma secondary to eye inflammation, right eye indeterminate stage       |
|         | ICD1 |                                                                             |
| H40.42  | 0    | Glaucoma secondary to eye inflammation, left eye                            |
| H40.42X | ICD1 |                                                                             |
| 0       | 0    | Glaucoma secondary to eye inflammation, left eye stage unspecified          |
| H40.42X | ICD1 |                                                                             |
| 1       | 0    | Glaucoma secondary to eye inflammation, left eye mild stage                 |
| H40.42X | ICD1 |                                                                             |
| 2       | 0    | Glaucoma secondary to eye inflammation, left eye moderate stage             |
| H40.42X | ICD1 |                                                                             |
| 3       | 0    | Glaucoma secondary to eye inflammation, left eye severe stage               |
| H40.42X | ICD1 |                                                                             |
| 4       | 0    | Glaucoma secondary to eye inflammation, left eye indeterminate stage        |
|         | ICD1 |                                                                             |
| H40.43  | 0    | Glaucoma secondary to eye inflammation, bilateral                           |



|         |      |                                                                                |
|---------|------|--------------------------------------------------------------------------------|
| H40.43X | ICD1 |                                                                                |
| 0       | 0    | Glaucoma secondary to eye inflammation, bilateral stage unspecified            |
| H40.43X | ICD1 |                                                                                |
| 1       | 0    | Glaucoma secondary to eye inflammation, bilateral mild stage                   |
| H40.43X | ICD1 |                                                                                |
| 2       | 0    | Glaucoma secondary to eye inflammation, bilateral moderate stage               |
| H40.43X | ICD1 |                                                                                |
| 3       | 0    | Glaucoma secondary to eye inflammation, bilateral severe stage                 |
| H40.43X | ICD1 |                                                                                |
| 4       | 0    | Glaucoma secondary to eye inflammation, bilateral indeterminate stage          |
|         | ICD1 |                                                                                |
| H40.5   | 0    | Glaucoma secondary to other eye disorders                                      |
|         | ICD1 |                                                                                |
| H40.50  | 0    | Glaucoma secondary to other eye disorders, unspecified eye                     |
| H40.50X | ICD1 |                                                                                |
| 0       | 0    | Glaucoma secondary to other eye disorders, unspecified eye stage unspecified   |
| H40.50X | ICD1 |                                                                                |
| 1       | 0    | Glaucoma secondary to other eye disorders, unspecified eye mild stage          |
| H40.50X | ICD1 |                                                                                |
| 2       | 0    | Glaucoma secondary to other eye disorders, unspecified eye moderate stage      |
| H40.50X | ICD1 |                                                                                |
| 3       | 0    | Glaucoma secondary to other eye disorders, unspecified eye severe stage        |
| H40.50X | ICD1 |                                                                                |
| 4       | 0    | Glaucoma secondary to other eye disorders, unspecified eye indeterminate stage |
|         | ICD1 |                                                                                |
| H40.51  | 0    | Glaucoma secondary to other eye disorders, right eye                           |
| H40.51X | ICD1 |                                                                                |
| 0       | 0    | Glaucoma secondary to other eye disorders, right eye stage unspecified         |
| H40.51X | ICD1 |                                                                                |
| 1       | 0    | Glaucoma secondary to other eye disorders, right eye mild stage                |
| H40.51X | ICD1 |                                                                                |
| 2       | 0    | Glaucoma secondary to other eye disorders, right eye moderate stage            |
| H40.51X | ICD1 |                                                                                |
| 3       | 0    | Glaucoma secondary to other eye disorders, right eye severe stage              |
| H40.51X | ICD1 |                                                                                |
| 4       | 0    | Glaucoma secondary to other eye disorders, right eye indeterminate stage       |
|         | ICD1 |                                                                                |
| H40.52  | 0    | Glaucoma secondary to other eye disorders, left eye                            |
| H40.52X | ICD1 |                                                                                |
| 0       | 0    | Glaucoma secondary to other eye disorders, left eye stage unspecified          |
| H40.52X | ICD1 |                                                                                |
| 1       | 0    | Glaucoma secondary to other eye disorders, left eye mild stage                 |
| H40.52X | ICD1 |                                                                                |
| 2       | 0    | Glaucoma secondary to other eye disorders, left eye moderate stage             |
| H40.52X | ICD1 |                                                                                |
| 3       | 0    | Glaucoma secondary to other eye disorders, left eye severe stage               |
| H40.52X | ICD1 |                                                                                |
| 4       | 0    | Glaucoma secondary to other eye disorders, left eye indeterminate stage        |
|         | ICD1 |                                                                                |
| H40.53  | 0    | Glaucoma secondary to other eye disorders, bilateral                           |
| H40.53X | ICD1 |                                                                                |
| 0       | 0    | Glaucoma secondary to other eye disorders, bilateral stage unspecified         |
| H40.53X | ICD1 |                                                                                |
| 1       | 0    | Glaucoma secondary to other eye disorders, bilateral mild stage                |
| H40.53X | ICD1 |                                                                                |
| 2       | 0    | Glaucoma secondary to other eye disorders, bilateral moderate stage            |

|         |      |                                                                          |
|---------|------|--------------------------------------------------------------------------|
| H40.53X | ICD1 |                                                                          |
| 3       | 0    | Glaucoma secondary to other eye disorders, bilateral severe stage        |
| H40.53X | ICD1 |                                                                          |
| 4       | 0    | Glaucoma secondary to other eye disorders, bilateral indeterminate stage |
|         | ICD1 |                                                                          |
| H40.6   | 0    | Glaucoma secondary to drugs                                              |
|         | ICD1 |                                                                          |
| H40.60  | 0    | Glaucoma secondary to drugs, unspecified eye                             |
| H40.60X | ICD1 |                                                                          |
| 0       | 0    | Glaucoma secondary to drugs, unspecified eye stage unspecified           |
| H40.60X | ICD1 |                                                                          |
| 1       | 0    | Glaucoma secondary to drugs, unspecified eye mild stage                  |
| H40.60X | ICD1 |                                                                          |
| 2       | 0    | Glaucoma secondary to drugs, unspecified eye moderate stage              |
| H40.60X | ICD1 |                                                                          |
| 3       | 0    | Glaucoma secondary to drugs, unspecified eye severe stage                |
| H40.60X | ICD1 |                                                                          |
| 4       | 0    | Glaucoma secondary to drugs, unspecified eye indeterminate stage         |
|         | ICD1 |                                                                          |
| H40.61  | 0    | Glaucoma secondary to drugs, right eye                                   |
| H40.61X | ICD1 |                                                                          |
| 0       | 0    | Glaucoma secondary to drugs, right eye stage unspecified                 |
| H40.61X | ICD1 |                                                                          |
| 1       | 0    | Glaucoma secondary to drugs, right eye mild stage                        |
| H40.61X | ICD1 |                                                                          |
| 2       | 0    | Glaucoma secondary to drugs, right eye moderate stage                    |
| H40.61X | ICD1 |                                                                          |
| 3       | 0    | Glaucoma secondary to drugs, right eye severe stage                      |
| H40.61X | ICD1 |                                                                          |
| 4       | 0    | Glaucoma secondary to drugs, right eye indeterminate stage               |
|         | ICD1 |                                                                          |
| H40.62  | 0    | Glaucoma secondary to drugs, left eye                                    |
| H40.62X | ICD1 |                                                                          |
| 0       | 0    | Glaucoma secondary to drugs, left eye stage unspecified                  |
| H40.62X | ICD1 |                                                                          |
| 1       | 0    | Glaucoma secondary to drugs, left eye mild stage                         |
| H40.62X | ICD1 |                                                                          |
| 2       | 0    | Glaucoma secondary to drugs, left eye moderate stage                     |
| H40.62X | ICD1 |                                                                          |
| 3       | 0    | Glaucoma secondary to drugs, left eye severe stage                       |
| H40.62X | ICD1 |                                                                          |
| 4       | 0    | Glaucoma secondary to drugs, left eye indeterminate stage                |
|         | ICD1 |                                                                          |
| H40.63  | 0    | Glaucoma secondary to drugs, bilateral                                   |
| H40.63X | ICD1 |                                                                          |
| 0       | 0    | Glaucoma secondary to drugs, bilateral stage unspecified                 |
| H40.63X | ICD1 |                                                                          |
| 1       | 0    | Glaucoma secondary to drugs, bilateral mild stage                        |
| H40.63X | ICD1 |                                                                          |
| 2       | 0    | Glaucoma secondary to drugs, bilateral moderate stage                    |
| H40.63X | ICD1 |                                                                          |
| 3       | 0    | Glaucoma secondary to drugs, bilateral severe stage                      |
| H40.63X | ICD1 |                                                                          |
| 4       | 0    | Glaucoma secondary to drugs, bilateral indeterminate stage               |
|         | ICD1 |                                                                          |
| H40.8   | 0    | Other glaucoma                                                           |

|         |      |                                                                    |
|---------|------|--------------------------------------------------------------------|
|         | ICD1 |                                                                    |
| H40.81  | 0    | Glaucoma with increased episcleral venous pressure                 |
|         | ICD1 |                                                                    |
| H40.811 | 0    | Glaucoma with increased episcleral venous pressure right eye       |
|         | ICD1 |                                                                    |
| H40.812 | 0    | Glaucoma with increased episcleral venous pressure left eye        |
|         | ICD1 |                                                                    |
| H40.813 | 0    | Glaucoma with increased episcleral venous pressure bilateral       |
|         | ICD1 |                                                                    |
| H40.819 | 0    | Glaucoma with increased episcleral venous pressure unspecified eye |
|         | ICD1 |                                                                    |
| H40.82  | 0    | Hypersecretion glaucoma                                            |
|         | ICD1 |                                                                    |
| H40.821 | 0    | Hypersecretion glaucoma right eye                                  |
|         | ICD1 |                                                                    |
| H40.822 | 0    | Hypersecretion glaucoma left eye                                   |
|         | ICD1 |                                                                    |
| H40.823 | 0    | Hypersecretion glaucoma bilateral                                  |
|         | ICD1 |                                                                    |
| H40.829 | 0    | Hypersecretion glaucoma unspecified eye                            |
|         | ICD1 |                                                                    |
| H40.83  | 0    | Aqueous misdirection                                               |
|         | ICD1 |                                                                    |
| H40.831 | 0    | Aqueous misdirection right eye                                     |
|         | ICD1 |                                                                    |
| H40.832 | 0    | Aqueous misdirection left eye                                      |
|         | ICD1 |                                                                    |
| H40.833 | 0    | Aqueous misdirection bilateral                                     |
|         | ICD1 |                                                                    |
| H40.839 | 0    | Aqueous misdirection unspecified eye                               |
|         | ICD1 |                                                                    |
| H40.89  | 0    | Other specified glaucoma                                           |
|         | ICD1 |                                                                    |
| H40.9   | 0    | Unspecified glaucoma                                               |

---

ICD = International Classification of Diseases; IRIS = Intelligent Research in Sight; X = any numeral. Source ICD9 <http://www.icd9data.com/2012/Volume1/320-389/360-379/365/default.htm> downloaded April 24, 2019; ICD10 <https://www.icd10data.com/ICD10CM/Codes/H00-H59/H40-H42/H40-> downloaded April 24, 2019;
