# Supplementary material for: Factors Associated With Laser Trabeculoplasty Response Duration: Analysis of a Large Clinical Database (IRIS Registry)
Source: PubMed Central journal article supplement — J Glaucoma. 2021 Aug 9;30(10):902–10. doi: 10.1097/IJG.0000000000001918 (PMC8483774; doi:10.1097/ijg.0000000000001918), 2021-08-09
Supplement: ijg-30-902-s002.pdf [file ijg-30-902-s002.pdf]

Supplemental Table 2. Univariable Survival Analysis of Laser Trabeculoplasty Outcomes.

| Parameters                     |                            | Hazard Ratio | 95% Hazard Ratio Confidence Limits |      | P value | Comments                                                                                                                                                                   |
|--------------------------------|----------------------------|--------------|------------------------------------|------|---------|----------------------------------------------------------------------------------------------------------------------------------------------------------------------------|
| Age                            | 18-39                      | 1.48         | 1.33                               | 1.65 | <.0001* | Age: per patient eye, 5 levels: 18-39, 40-64, 65-79 (reference), 80+                                                                                                       |
|                                | 40-64                      | 1.08         | 1.05                               | 1.12 | <.0001* |                                                                                                                                                                            |
|                                | 80+                        | 1.26         | 1.22                               | 1.30 | <.0001* |                                                                                                                                                                            |
|                                | Unknown                    | 1.23         | 1.02                               | 1.48 | 0.031*  |                                                                                                                                                                            |
| Gender                         | Female                     | 0.93         | 0.91                               | 0.96 | <.0001* | Gender: per patient, 3 levels: male (reference), Female, Unspecified                                                                                                       |
|                                | Unspecified                | 1.26         | 1.01                               | 1.56 | 0.040*  |                                                                                                                                                                            |
| Region                         | Midwest                    | 0.92         | 0.89                               | 0.95 | <.0001* | Region: per patient eye, provider region, 5 levels: Midwest, Northeast, West, South (reference), Unknown                                                                   |
|                                | Northeast                  | 0.96         | 0.92                               | 1.00 | 0.032*  |                                                                                                                                                                            |
|                                | West                       | 0.88         | 0.85                               | 0.92 | <.0001* |                                                                                                                                                                            |
|                                | Unknown                    | 0.85         | 0.78                               | 0.94 | 0.0008* |                                                                                                                                                                            |
| Race                           | Asian                      | 1.17         | 1.05                               | 1.30 | 0.0044* | Race: per patient, 6 levels: White (reference), Asian, Black, Hispanic, Multi-Race/Other, Unknown                                                                          |
|                                | Black                      | 1.14         | 1.09                               | 1.19 | <.0001* |                                                                                                                                                                            |
|                                | Hispanic                   | 1.04         | 0.98                               | 1.12 | 0.21    |                                                                                                                                                                            |
|                                | Multi-Race/Other           | 1.05         | 1.00                               | 1.10 | 0.079   |                                                                                                                                                                            |
| Insurance type                 | Unknown                    | 1.67         | 1.59                               | 1.76 | <.0001* | Insurance: per patient, 8 levels: Dual Medicare/Medicaid, Medicaid, Medicare Advantage, Medicare Fee for Service, Military, Other Government, Unknown, Private (reference) |
|                                | Dual Medicare and Medicaid | 0.75         | 0.71                               | 0.79 | <.0001* |                                                                                                                                                                            |
|                                | Medicaid                   | 1.10         | 1.01                               | 1.21 | 0.037*  |                                                                                                                                                                            |
|                                | Medicare Adv               | 0.87         | 0.83                               | 0.92 | <.0001* |                                                                                                                                                                            |
|                                | Medicare FFS               | 0.81         | 0.78                               | 0.84 | <.0001* |                                                                                                                                                                            |
|                                | Military                   | 1.29         | 1.11                               | 1.50 | 0.0011* |                                                                                                                                                                            |
| Other Government               | Other Government           | 1.46         | 1.07                               | 1.99 | 0.018*  |                                                                                                                                                                            |
|                                | Unknown                    | 1.24         | 1.18                               | 1.31 | <.0001* |                                                                                                                                                                            |
| Number of glaucoma medications |                            | 0.98         | 0.97                               | 0.99 | <.0001* |                                                                                                                                                                            |
| Mean baseline IOP              |                            | 1.00         | 1.00                               | 1.01 | 0.0019* |                                                                                                                                                                            |
| Mean baseline VA               |                            | 1.24         | 1.18                               | 1.29 | <.0001* |                                                                                                                                                                            |
| Provider status                | Group 2                    | 1.01         | 0.97                               | 1.04 | 0.7737  | Provider Status: per patient eye, 3 levels: Group 1 (glaucoma surgeon) (reference), Group 2 (other anterior segment surgeon), or Group 3 (unknown)                         |
|                                | Group 3                    | 1.26         | 1.22                               | 1.31 | <.0001* |                                                                                                                                                                            |
|                                | No provider information    | 0.83         | 0.74                               | 0.94 | 0.0021* |                                                                                                                                                                            |

|                                      |                            |      |      |      |         |                                                                                                                                                 |
|--------------------------------------|----------------------------|------|------|------|---------|-------------------------------------------------------------------------------------------------------------------------------------------------|
| Prior glaucoma procedures            | yes                        | 1.24 | 1.12 | 1.38 | <.0001* |                                                                                                                                                 |
| Prior lens surgery                   | yes                        | 1.50 | 1.43 | 1.59 | <.0001* |                                                                                                                                                 |
| Prior intravitreal injections        | yes                        | 1.19 | 1.09 | 1.30 | 0.0002* |                                                                                                                                                 |
| Diabetes                             | yes                        | 1.15 | 1.11 | 1.19 | <.0001* |                                                                                                                                                 |
| Hypertension                         | yes                        | 1.05 | 0.97 | 1.15 | 0.2281  |                                                                                                                                                 |
| Angle recession                      | yes                        | 1.69 | 1.05 | 2.73 | 0.0299* |                                                                                                                                                 |
| Uveitis                              | yes                        | 1.80 | 1.55 | 2.09 | <.0001* |                                                                                                                                                 |
| Provider LTP count in preceding year | 50-99                      | 1.27 | 1.23 | 1.31 | <.0001* | Number of LTP performed by provider in the year preceding treatment date, per patient eye, 4 levels: <50 (reference), 50-99, 100-499, 500+      |
|                                      | 100-499                    | 1.28 | 1.19 | 1.39 | <.0001* |                                                                                                                                                 |
|                                      | 500+                       | 1.17 | 1.12 | 1.21 | <.0001* |                                                                                                                                                 |
| Glaucoma type                        | Inflammation/Drugs         | 1.39 | 1.13 | 1.73 | 0.0023* | Glaucoma Type: per patient eye, 6 levels: Suspect (reference), POAG, Trauma, Inflammation, Other, Unspecified                                   |
|                                      | POAG                       | 1.30 | 1.26 | 1.35 | <.0001* |                                                                                                                                                 |
|                                      | Trauma/Other Eye Disorders | 1.22 | 1.01 | 1.46 | 0.0353* |                                                                                                                                                 |
|                                      | Other Glaucoma             | 1.04 | 0.76 | 1.42 | 0.8215  |                                                                                                                                                 |
|                                      | Unspecified Glaucoma       | 0.56 | 0.53 | 0.60 | <.0001* |                                                                                                                                                 |
| Glaucoma severity                    | Moderate                   | 0.90 | 0.86 | 0.94 | <.0001* | Glaucoma Severity: per patient eye, stage closest to LTP date, 6 levels: Mild (reference), Moderate, Severe, Indeterminate, Unspecified/Missing |
|                                      | Severe                     | 0.86 | 0.82 | 0.90 | <.0001* |                                                                                                                                                 |
|                                      | Indeterminate              | 1.10 | 1.01 | 1.20 | 0.0235* |                                                                                                                                                 |
|                                      | Missing/Unspecified        | 0.30 | 0.29 | 0.32 | <.0001* |                                                                                                                                                 |
| Lens status                          | Aphakia                    | 0.84 | 0.65 | 1.08 | 0.1677  | Lens Status: 4 levels: Cataract (reference), Pseudophakia, Aphakia, Unknown                                                                     |
|                                      | Pseudophakia               | 0.81 | 0.76 | 0.86 | <.0001* |                                                                                                                                                 |
|                                      | Unknown                    | 0.46 | 0.45 | 0.47 | <.0001* |                                                                                                                                                 |
| LTP treatment group                  | Double                     | 1.04 | 0.95 | 1.14 | 0.4354  | LTP treatment in one session (reference) or in two or more session (“double”)                                                                   |
|                                      |                            |      |      |      |         |                                                                                                                                                 |

\*Statistically significant; Adv (Advantage); FFS (Fee for Service); IOP (intraocular pressure); LTP (laser trabeculoplasty); POAG (primary open angle glaucoma); VA (visual acuity). All P values from univariable Cox proportional hazards regression.
